# Supplementary material
Source: PubMed Central journal article supplement (PMC4023681)
Supplement: NIHMS494558-supplement-02.pdf [file NIHMS494558-supplement-02.pdf]

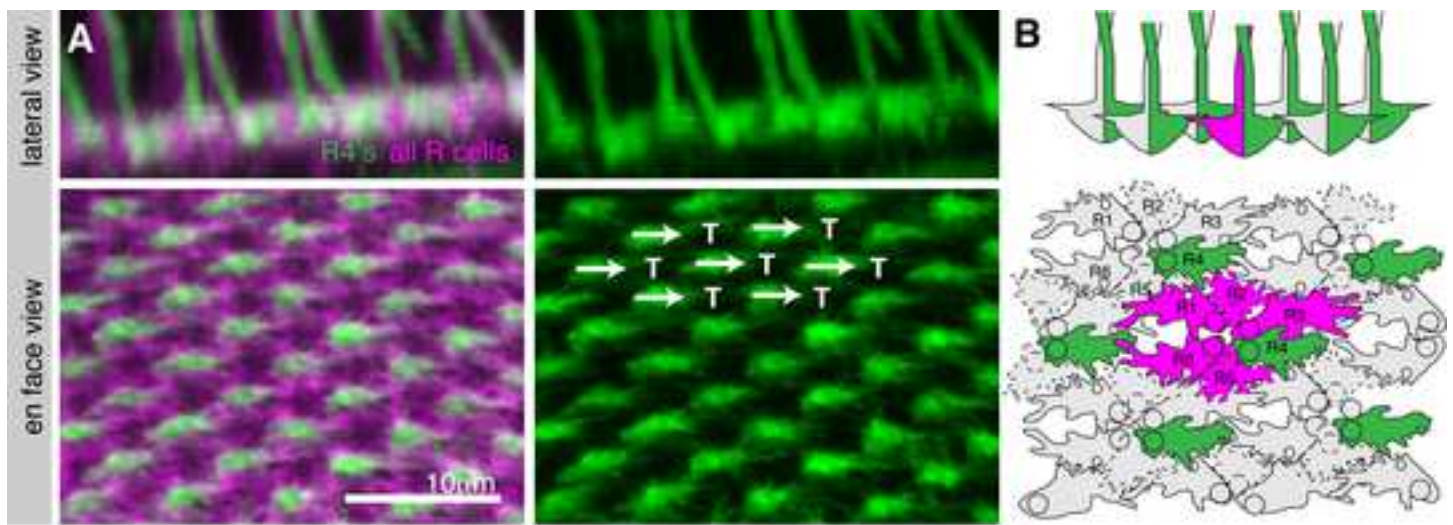

Figure S1- related to Figure 1

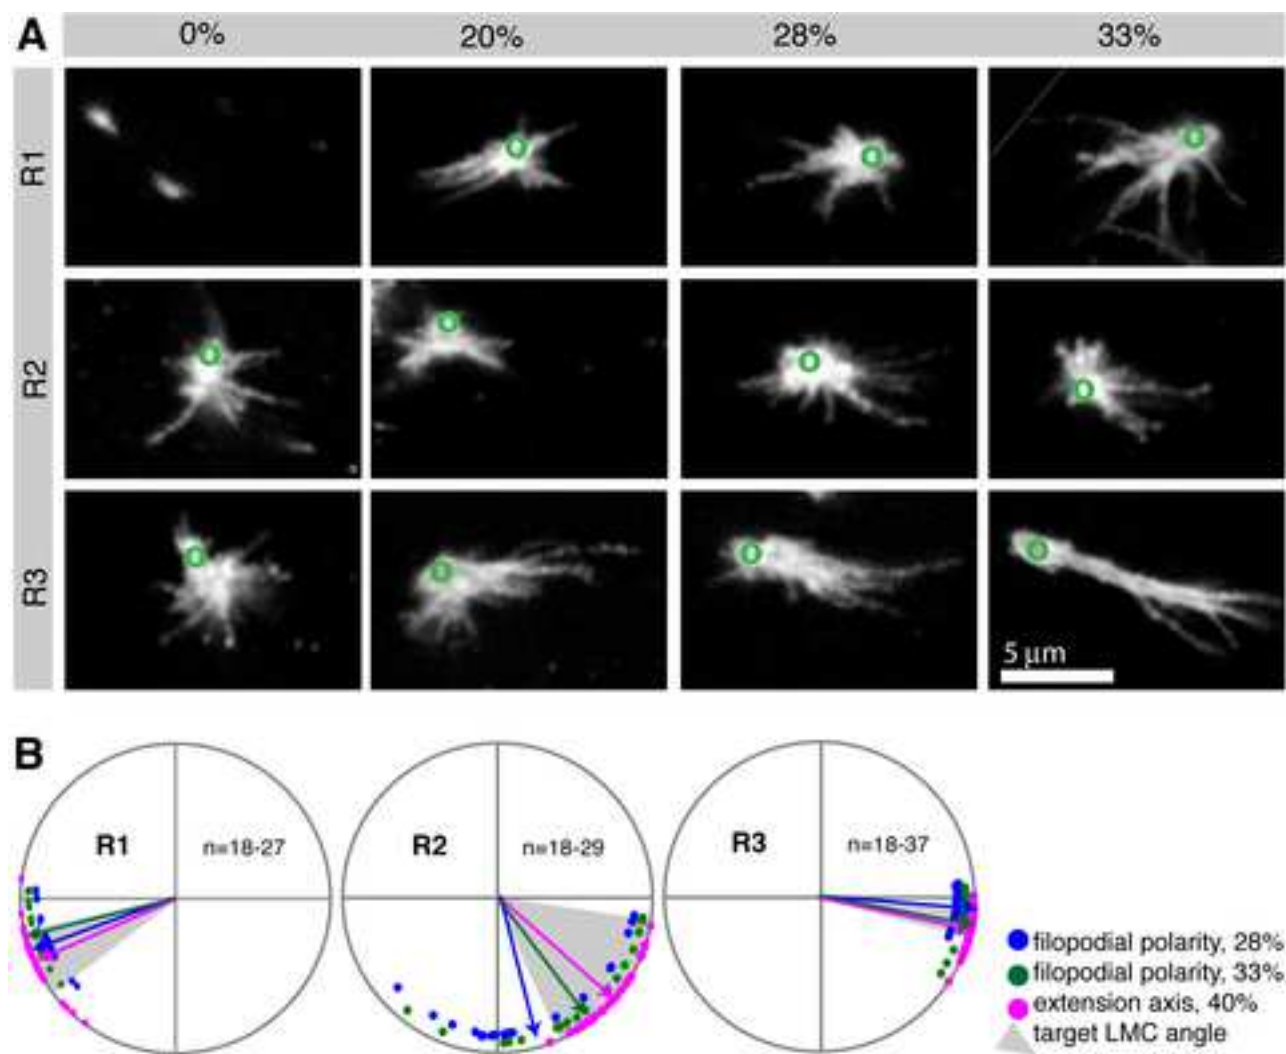

Figure S2; related to Figure 2

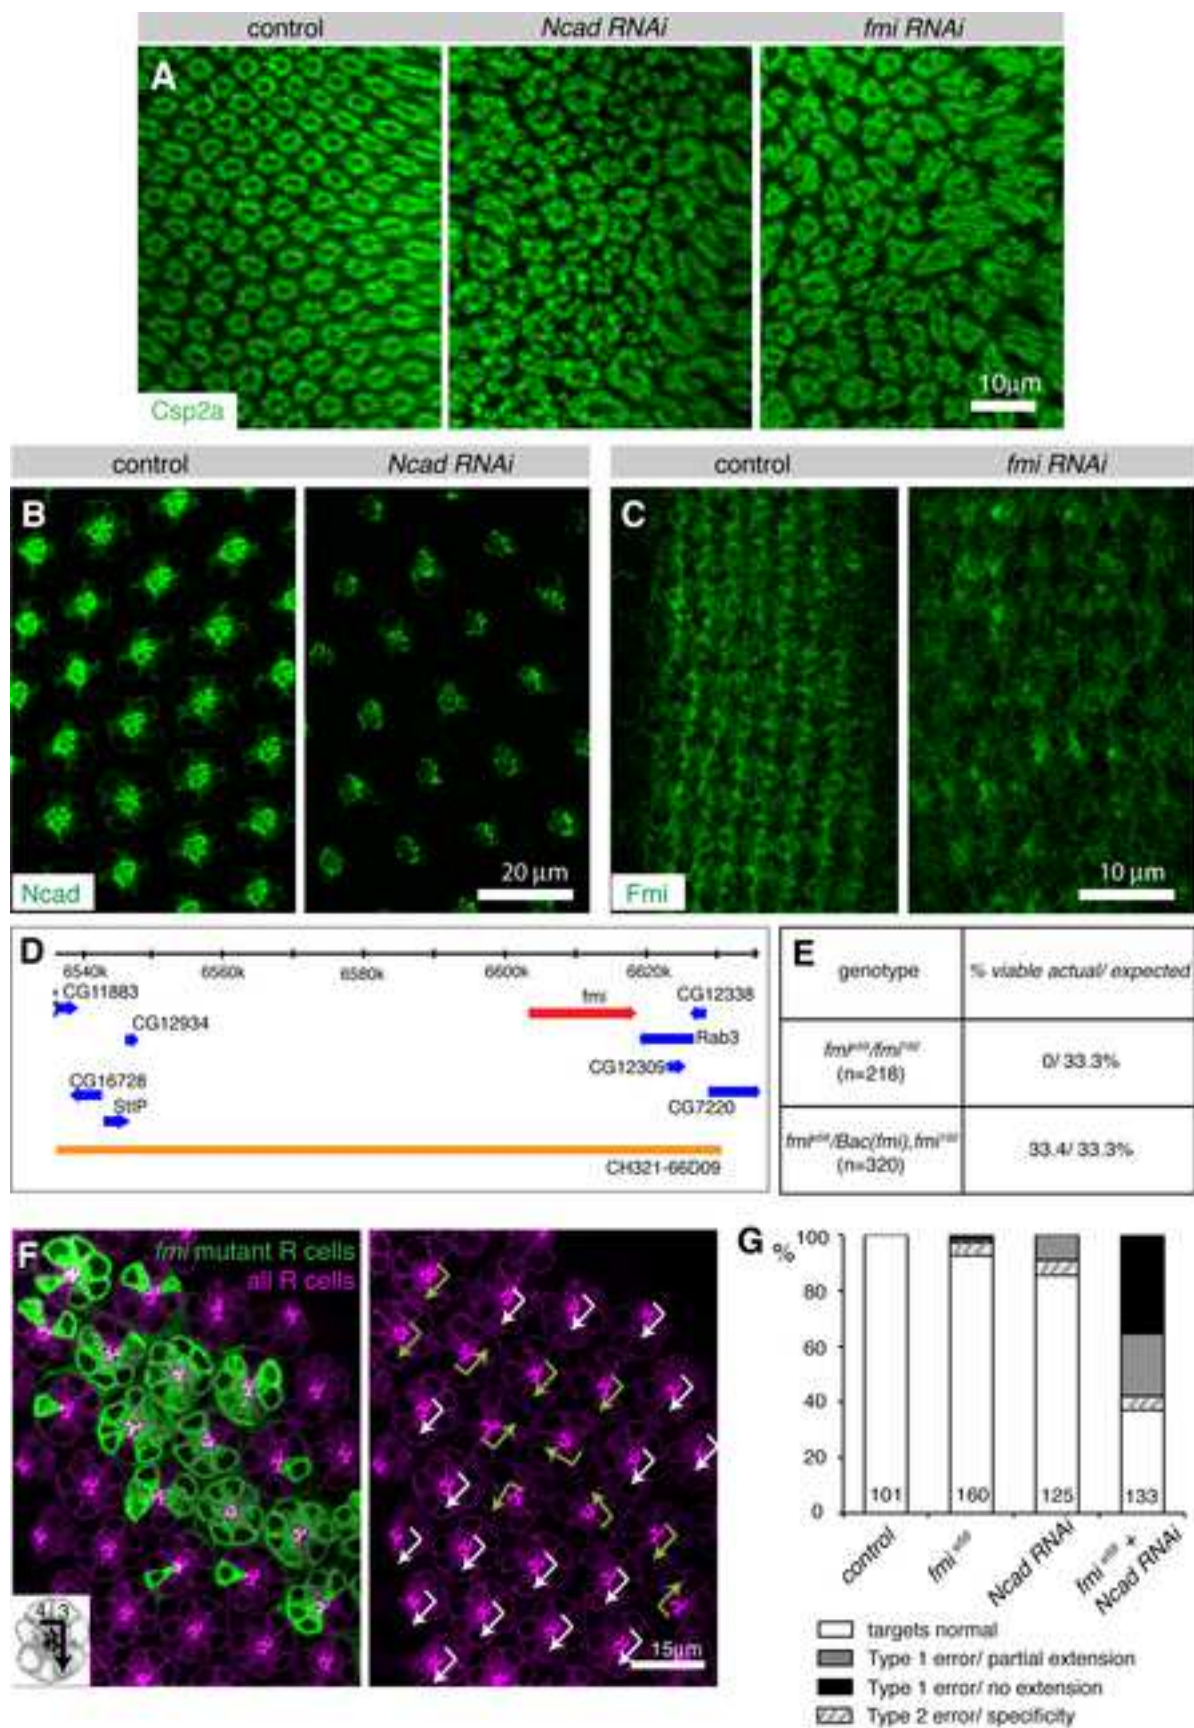

Figure S3- related to Figure 3

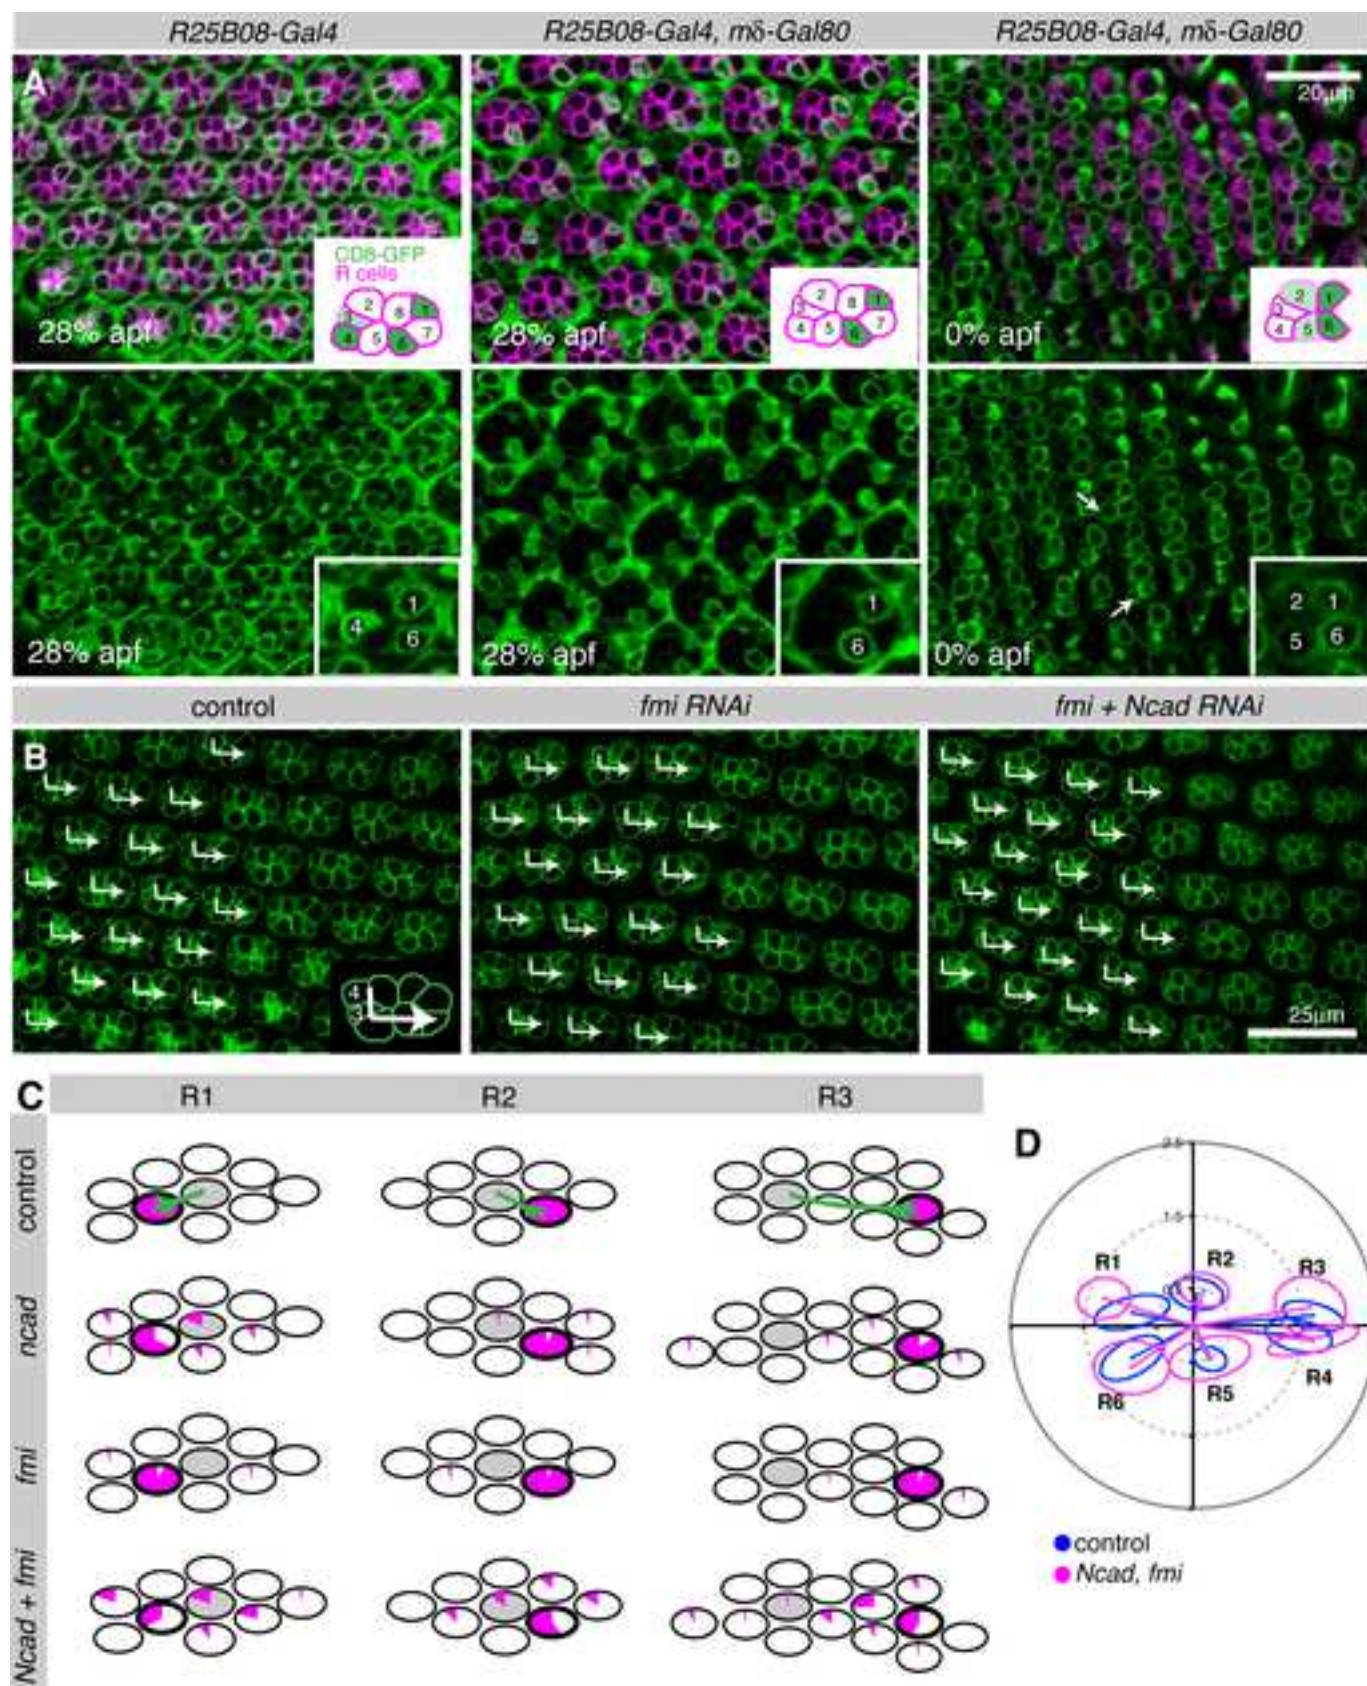

Figure S4- related to Figure 4

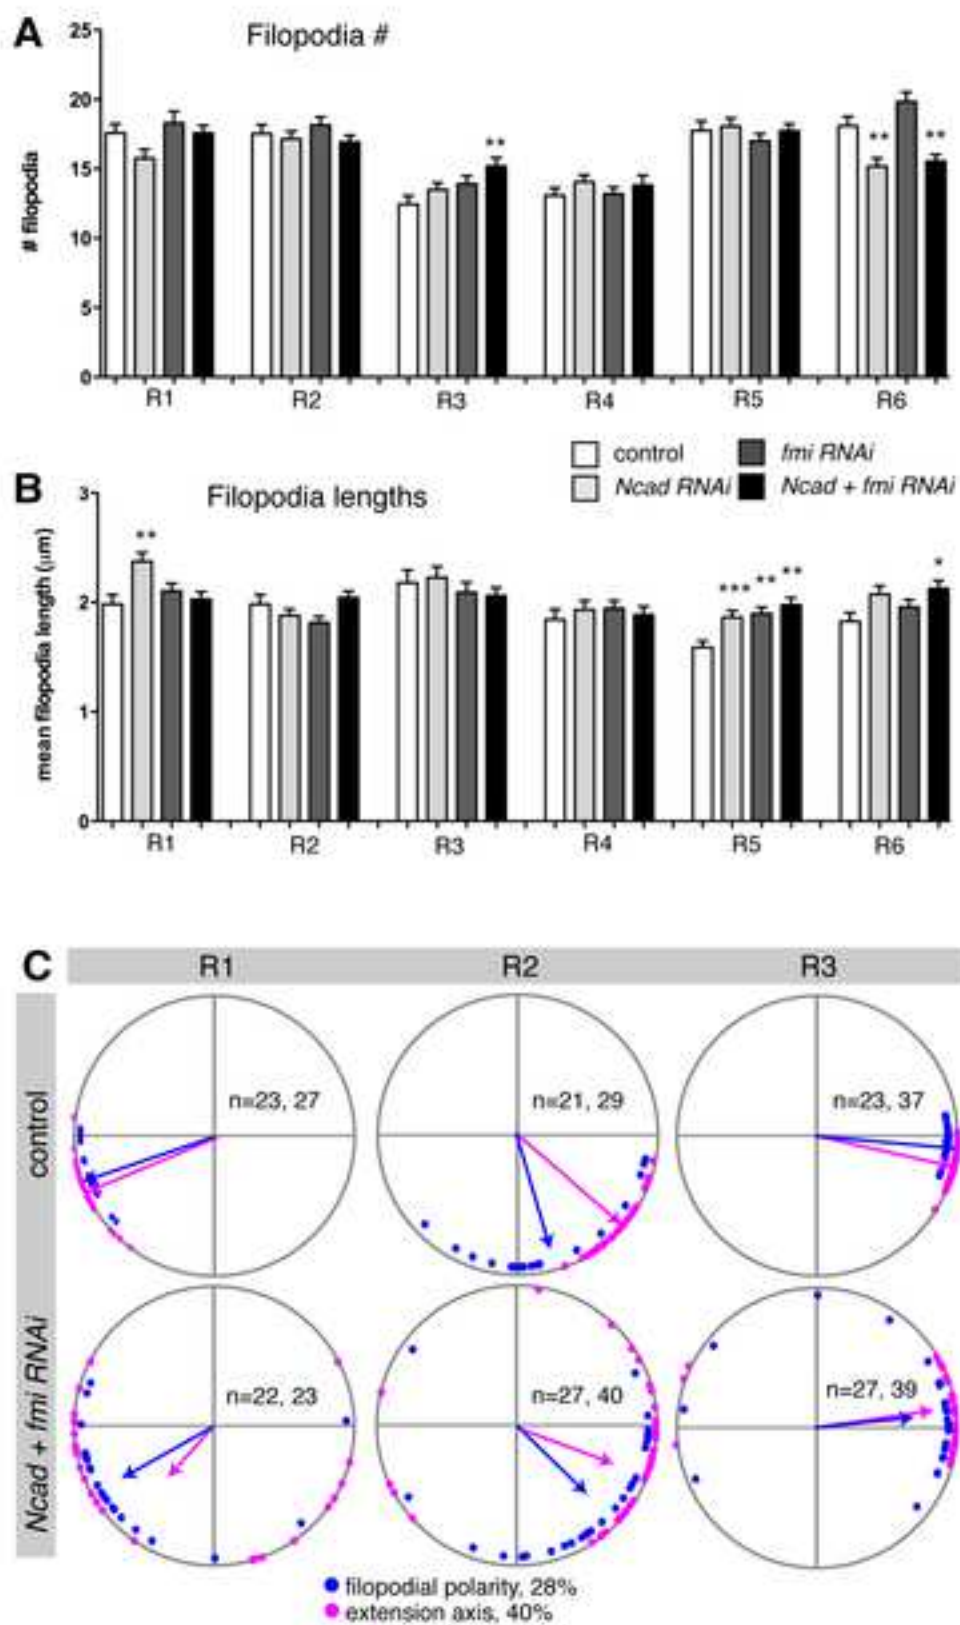

Figure S5, related to Figure 5

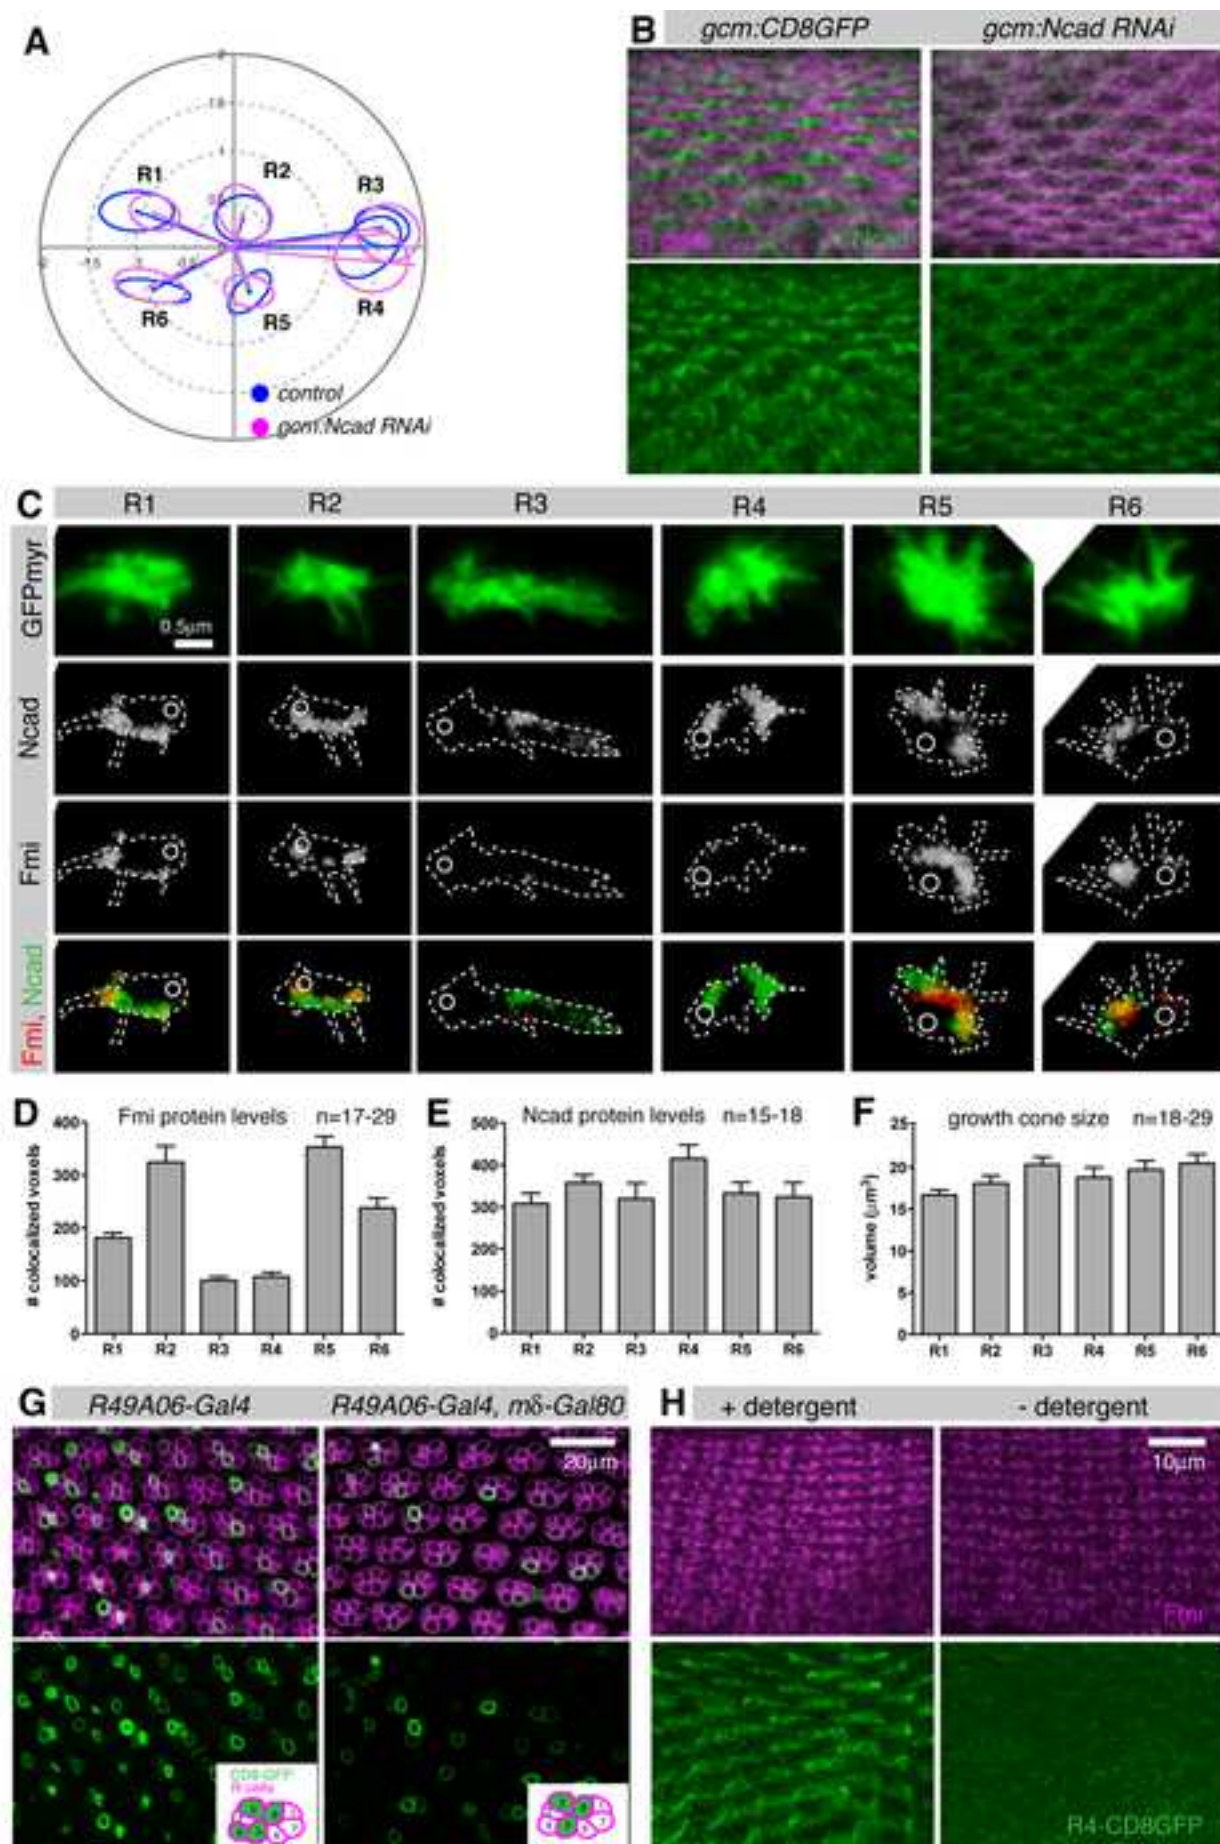

Figure S6- related to Figure 6
